1           **A high affinity human monoclonal antibody against Pfs230 binds multiple**  
2           **parasite stages and blocks oocyst formation in mosquitoes**  
3

4  
5 Camila H. Coelho<sup>1,11</sup>, Wai Kwan Tang<sup>2,11</sup>, Martin Burkhardt<sup>3</sup>, Jacob D. Galson<sup>4,5</sup>, Olga  
6 Muratova<sup>3</sup>, Nichole D. Salinas<sup>2</sup>, Thiago Luiz Alves e Silva<sup>6</sup>, Karine Reiter<sup>3</sup>, Nicholas J.  
7 MacDonald<sup>3</sup>, Vu Nguyen<sup>3</sup>, Raul Herrera<sup>3</sup>, Richard Shimp<sup>3</sup>, David L. Narum<sup>3</sup>, Miranda  
8 Byrne-Steele<sup>7</sup>, Wenjing Pan<sup>7</sup>, Xiaohong Hou<sup>7</sup>, Brittany Brown<sup>7</sup>, Mary Eisenhower<sup>7</sup>, Jian  
9 Han<sup>7</sup>, Bethany J. Jenkins<sup>1</sup>, Justin Yai Alamou Doritchamou<sup>1</sup>, Margery G. Smelkinson<sup>8</sup>,  
10 Joel Vega-Rodriguez<sup>6</sup>, Johannes Trück<sup>4</sup>, Justin J. Taylor<sup>9</sup>, Issaka Sagara<sup>10</sup>, Jonathan P.  
11 Renn<sup>3</sup>, Niraj H. Tolia<sup>2,12\*</sup>, Patrick E. Duffy<sup>1,12\*</sup>  
12  
13

14 1 - Pathogenesis and Immunity Section, Laboratory of Malaria Immunology and  
15 Vaccinology, National Institute of Allergy and Infectious Diseases, National Institutes of  
16 Health, Bethesda, MD, USA

17 2 - Host-Pathogen Interactions and Structural Vaccinology Section, Laboratory of  
18 Malaria Immunology and Vaccinology, National Institute of Allergy and Infectious  
19 Diseases, National Institutes of Health, Bethesda, MD, USA

20 3- Vaccine Development Unit, Laboratory of Malaria Immunology and Vaccinology,  
21 National Institute of Allergy and Infectious Diseases, National Institutes of Health,  
22 Bethesda, MD, USA

23 4 - University Children's Hospital, and the Children's Research Center, University of  
24 Zurich, Zurich, Switzerland

25 5- Alchemab Therapeutics Ltd, 55-56 Russell Square, London, WC1B 4HP, UK

26 6 - Laboratory of Malaria and Vector Research, National Institute of Allergy and  
27 Infectious Diseases, National Institutes of Health, Rockville, MD, United States

28 7 - iRepertoire Inc., Huntsville, AL, USA.

29 8- Biological Imaging Section, National Institute of Allergy and Infectious Diseases,  
30 National Institutes of Health, Bethesda, MD, USA

31 9 - Fred Hutchinson Cancer Research Center, Seattle, WA, USA

32 10 - Malaria Research and Training Center, University of Sciences, Techniques, and  
33 Technology, Bamako, Mali

34 11-These authors contributed equally: Camila H. Coelho, Wai Kwan Tang

35 12- These authors jointly directed this work Niraj H. Tolia<sup>1</sup>, Patrick E. Duffy  
36  
37

38 \* Corresponding authors:

39 [patrick.duffy@nih.gov](mailto:patrick.duffy@nih.gov) and [niraj.tolia@nih.gov](mailto:niraj.tolia@nih.gov)  
40

41 Laboratory of Malaria Immunology and Vaccinology, National Institute of Allergy and Infectious Diseases,  
42 National Institutes of Health, 9000 Rockville Pike, Bethesda MD 20892, USA.

43  
44  
45  
46  
47  
48  
49  
50  
51  
52  
53  
54  
55  
56  
57  
58  
59  
60  
61  
62  
63  
64  
65  
66

## ABSTRACT

Malaria elimination requires tools that interrupt parasite transmission. Here, we characterized B cell receptor responses among Malian adults vaccinated against the first domain of the cysteine-rich 230kDa gamete surface protein Pfs230<sup>1-3</sup> to neutralize sexual stage *P. falciparum* parasites and halt their further spread. We generated nine Pfs230 human monoclonal antibodies (mAbs). One mAb potently blocked transmission to mosquitoes in a complement-dependent manner and reacted strongly to gamete surface while eight mAbs showed only low or no blocking activity. This study provides a rational basis to improve malaria vaccines and develop therapeutic antibodies for malaria elimination.

67           **MAIN TEXT**

68           Malaria eradication is a global priority and will require innovative strategies that,  
69 in addition to preventing or controlling human infection, might block parasite  
70 transmission through mosquitoes. Sequences of matched heavy and light chain variable  
71 regions from single human B cells have been used to identify antibodies generated in  
72 response to infection or vaccination and inform vaccinology<sup>4-7</sup>. In this study, we apply  
73 this approach to examine human antibodies elicited in response to a transmission  
74 blocking vaccine (TBV), that used a Pfs230 fragment as antigen. Pfs230 is present on  
75 the surface of *P. falciparum* gametocytes and gametes and mediates binding of  
76 exflagellating microgametes to red blood cells, thus parasites lacking this protein cannot  
77 bind to red blood cells or further develop into oocysts.<sup>1</sup> We collected Pfs230 domain 1  
78 (D1)-specific single memory B cells ([Extended Data Fig. 1](#), [Extended Data Fig. 2a](#))  
79 from eight Malian adults immunized with four doses of Pfs230D1-EPA/Alhydrogel®  
80 vaccine (Clinicaltrials.gov NCT02334462) to identify functional monoclonal antibodies  
81 elicited in response to a TBV. This vaccine aims to neutralize sexual stage *P. falciparum*  
82 parasites by targeting Pfs230, a 230kDa gamete surface protein comprised of fourteen  
83 6-cysteine (6-Cys) domains<sup>1-3</sup>. All samples were chosen from subjects presenting high  
84 serum Transmission-Reducing Activity (TRA), measured by the capacity of serum  
85 antibodies from immunized subjects to reduce the number of oocysts that develop in  
86 mosquitoes fed on in vitro cultured *P. falciparum* gametocytes ([Extended Data Table](#)  
87 [1](#)).

88           We obtained 272 VH and 351 VL sequences of B cell receptor (BCR) from  
89 Pfs230D1-specific single memory B cells from the vaccinees via amplification and

90 sequencing of the V(D)J region (**Extended Data Fig. 3**). When analysing V gene usage  
91 of the BCR sequences, 87.5% of the subjects presented Pfs230D1-specific memory B  
92 cells using kappa chains derived from IGKV4-1 (**Extended Data Fig. 2e**). This light  
93 chain gene has also been identified in sequences of functional human mAbs obtained in  
94 response to other *Plasmodium* antigens<sup>4-6,8</sup>. For the heavy chain, IGHV1-69 was the  
95 most commonly expressed gene and detected in 100% (8/8) of vaccinees (**Extended**  
96 **Data Fig. 2f**). IGHV1-69 is one of the most polymorphic loci of the IGHV gene cluster<sup>9</sup>  
97 and is frequently found in broadly neutralizing antibodies generated in response to  
98 influenza haemagglutinin<sup>10,11</sup>.

99         Nine pairs of BCR sequences were chosen for expression of fully human  
100 Pfs230D1 IgG1 antibodies by assessing whether the CDR3 sequences were shared  
101 between sorted B cells. This approach identifies identical sequences in multiple B cells  
102 from the same subject, indicating that they have been activated in response to  
103 vaccination. These nine pairs (**Fig. 1a**) represented distinct heavy and light chain  
104 germline genes with an overabundance of IGHV1-18 (N=6), IGHV1-69 (N=3), and  
105 IGKV4-1 (N=7). The resulting recombinant antibodies bound to Pfs230D1 antigen  
106 (**Figure 1d,e, Extended Data Figure 4**). Competitive epitope binning of the nine mAbs  
107 suggested they bind three non-overlapping epitopes in Pfs230D1 (**Fig. 1b**). LMIV230-01  
108 forms a distinct group (Group 1) and has potent neutralizing activity (**Fig. 1b, c**). The  
109 remaining mAbs do not compete with LMIV230-01 and may form two additional epitope  
110 groups. Group 2 and 3 mAbs possess low or no neutralizing activity (**Fig. 1c**). We

111 therefore focused most of our subsequent analyses on LMIV230-01 and to a lesser  
112 extent on LMIV230-02, which demonstrated low functional activity.

113 LMIV230-01 and 02 bound to Pfs230D1 recombinant protein (**Fig. 1d**) with  
114 strong and similar binding affinities (**Fig. 1e, Extended Data Fig. 4, Extended Data**  
115 **Table 2**). We confirmed the two mAbs bind distinct epitopes using competition ELISA  
116 (**Extended data Figure 5d**) consistent with the epitope binning results (**Fig. 1b**).  
117 Despite their shared use of IGHV1-69, LMIV230-01 and LMIV230-02 displayed  
118 numerous differences in their heavy chain CDRs, consistent with their recognition of  
119 distinct epitopes (**Extended Data Figure 12**).

120 Although presenting similar affinity to Pfs230D1, the mAbs differed in their  
121 functional activity as measured by SMFA. LMIV230-01 ablated *P. falciparum* oocyst  
122 burden in mosquitoes in a dose-dependent manner with 91.7% neutralization (TRA) at  
123 1000 µg/mL (**Fig. 1f**). Importantly, 80.3% neutralization was retained at 60 µg/mL. On  
124 the other hand, LMIV230-02 reduced oocyst burden by only 58.7% at the maximum  
125 concentration of 1000 µg/mL and activity was lost at 250 µg/mL. As previously reported,  
126 TRA values higher than 80% are highly reproducible across independent  
127 experiments<sup>12,13</sup>. Combining the two antibodies did not increase their overall activity:  
128 TRA values were not statistically different when 500µg of LMIV230-02 was combined  
129 with 10µg of LMIV230-01 (TRA= 58.7%) versus 10µg of LMIV230-01 alone (TRA=  
130 52.5%) in mosquito feeding assays (**Extended Data Figure 5e**).

131 To understand the differences in functional activity of the two mAbs, we  
132 assessed binding to the native protein. Both mAbs reacted to the protein extract of

133 parasites and were sensitive to reduction of the two disulfide-bonds, suggesting the  
134 presence of conformational epitopes (**Fig. 1g, Extended Data Fig. 5c**). Interestingly,  
135 LMIV230-01 strongly labelled the surface of live *P. falciparum* gametes purified 2 hours  
136 post-exflagellation, while LMIV230-02 did not (**Fig. 1h**). This suggests that the  
137 LMIV230-02 epitope is not completely accessible on the surface-displayed native  
138 protein, possibly due to structural limitations imposed by the multi-domain protein  
139 Pfs230, as has been seen for other proteins<sup>14,15</sup> including another 6-Cys TBV  
140 candidate<sup>16</sup>.

141

**a**

| mAb        | Heavy chain | Light chain |
|------------|-------------|-------------|
| LMIV230-01 | IGHV1-69    | IGKV1-5     |
| LMIV230-02 | IGHV1-69    | IGKV4-1     |
| GKV16      | IGHV1-69    | IGKV4-1     |
| GKV08      | IGHV1-18    | IGKV4-1     |
| GKV01      | IGHV1-18    | IGKV4-1     |
| GKV07      | IGHV1-18    | IGKV4-1     |
| GKV05      | IGHV1-18    | IGKV4-1     |
| GKV06      | IGHV1-18    | IGKV4-1     |
| GKV22      | IGHV1-18    | IGKV2-28    |

**b**

|            | Group 1    |            |       |       |       |       |       | Group 2    |            |       |       |       |       |       | Group 3 |       |
|------------|------------|------------|-------|-------|-------|-------|-------|------------|------------|-------|-------|-------|-------|-------|---------|-------|
|            | LMIV230-01 | LMIV230-02 | GKV01 | GKV05 | GKV06 | GKV07 | GKV22 | LMIV230-01 | LMIV230-02 | GKV01 | GKV05 | GKV06 | GKV07 | GKV22 | GKV08   | GKV16 |
| LMIV230-01 | 100        | 85         | 100   | 100   | 100   | 100   | 100   | 95         | 100        | 100   | 99    | 100   | 100   | 100   | 100     |       |
| LMIV230-02 | 85         | 100        | 10    | 13    | 14    | 18    | 4     | 10         | 100        | 13    | 14    | 18    | 4     | 51    | 60      |       |
| GKV01      | 100        | 10         | 100   | 1     | 1     | 1     | 3     | 0          | 0          | 1     | 1     | 1     | 3     | 41    | 50      |       |
| GKV05      | 100        | 10         | 0     | 100   | 0     | 0     | 0     | 0          | 0          | 0     | 0     | 0     | 0     | 40    | 49      |       |
| GKV06      | 100        | 10         | 0     | 0     | 100   | 1     | 0     | 0          | 0          | 1     | 1     | 0     | 0     | 40    | 51      |       |
| GKV07      | 100        | 10         | 0     | 0     | 0     | 100   | 0     | 0          | 0          | 1     | 1     | 0     | 0     | 41    | 53      |       |
| GKV22      | 89         | 4          | 0     | 0     | 4     | 3     | 7     | 0          | 0          | 3     | 7     | 0     | 0     | 38    | 41      |       |
| GKV08      | 71         | 0          | 0     | 0     | 0     | 0     | 0     | 0          | 0          | 0     | 0     | 0     | 0     | 0     | 18      |       |
| GKV16      | 24         | 0          | 0     | 0     | 0     | 0     | 0     | 0          | 0          | 0     | 0     | 0     | 0     | 0     | 0       |       |

**c**

| TRA% | 375 µg/mL | 250 µg/mL | LMIV230-01 | LMIV230-02 | GKV01 | GKV05 | GKV06 | GKV07 | GKV22 | GKV08 | GKV16 |
|------|-----------|-----------|------------|------------|-------|-------|-------|-------|-------|-------|-------|
|      | ---       | 85%       | ---        | 51%        | 20%   | 0%    | 10%   | 10%   | 0%    | 0%    | 0%    |
|      |           |           |            |            | ---   | ---   | ---   | ---   | ---   | ---   | ---   |

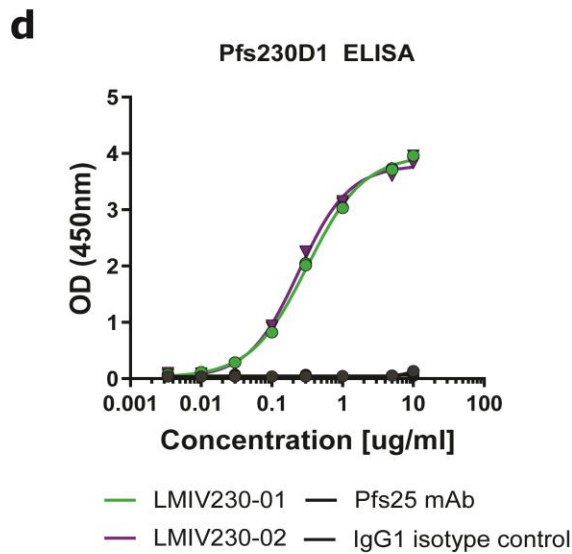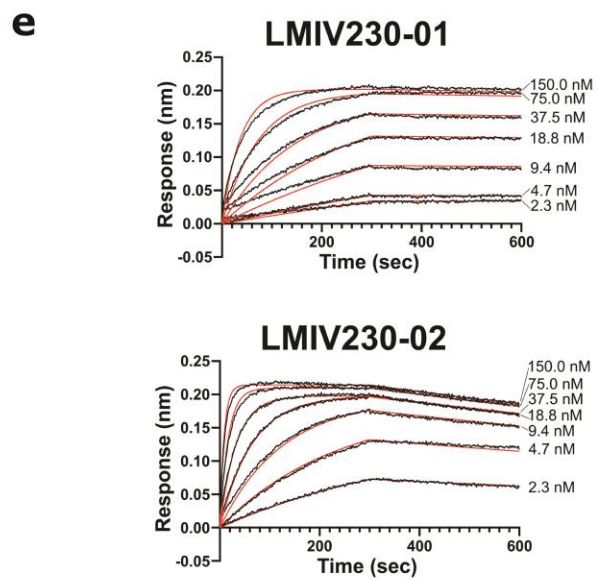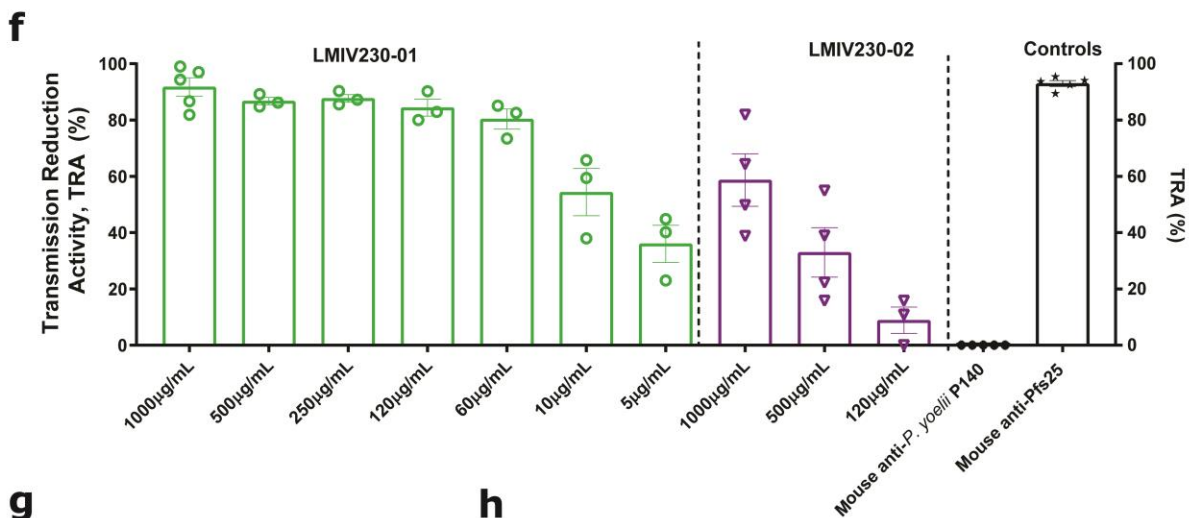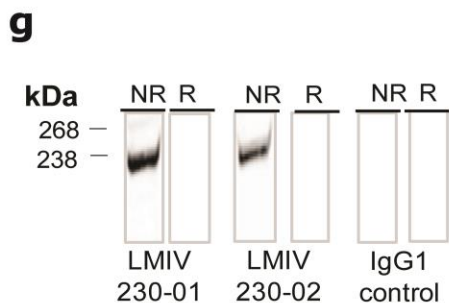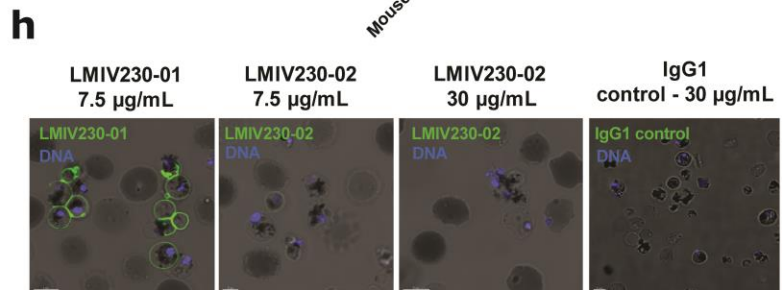

143 **Fig. 1| Human recombinant mAbs were generated from Pfs230D1-specific single memory B cells**  
144 **of Malian adults vaccinated with the Pfs230D1-EPA/Alhydrogel® TBV. a,** VH and VL genes  
145 corresponding to each mAb. LMIV230-01 and LMIV230-02 sequences originate from the IGHV1-69 heavy  
146 chain gene but utilize different kappa chain genes. Complete V gene usage determined in Pfs230-specific  
147 memory B cells is described in [Extended Data Figures 2e,f](#). **b,** Epitope binning of human anti-  
148 Pfs230D1scFvs. The primary binding scFv is listed on the left and the competing scFv are listed on the  
149 top. Reported scores are a percentage of total binding of that antibody in the absence of a competitor  
150 scFv. Values greater than 50% display low amounts of competition, while values lower than 50% exhibit  
151 greater competition. Any experiment with >100% binding was given a score of 100, while negative values  
152 were given a score of 0. Potential epitope bins are grouped and labelled above the table. **c,** Functional  
153 activity of each mAb, assessed by Standard Membrane Feeding Assay (SMFA) and measured as the %  
154 reduction (versus control mAb) in the number of *P. falciparum* NF54 oocysts in midguts of *Anopheles*  
155 mosquitoes ("TRA"). **d,** LMIV230-01 and LMIV230-02 mAbs bound similarly to Pfs230D1 and **e,** show  
156 high affinity to recombinant Pfs230D1 ([Extended Data Fig. 4](#), [Extended Data Table 2](#)) **f,** LMIV230-01  
157 reduces *P. falciparum* NF54 oocyst numbers by 91.7% at 1000 µg/mL, 86.7% at 500 µg/mL, 84.4% at  
158 250 µg/mL and 80.3% at 60 µg/mL, while LMIV230-02 displays only modest activity with 58.7% reduction  
159 at the maximum concentration of 1000 µg/mL, in SMFA. Data from eleven independent SMFA and each  
160 concentration was evaluated in at least three biological replicates for each mAb. N ≥ 20 mosquitos per  
161 assay. Average oocyst numbers in the control mosquitoes (fed with mouse IgG1 mAb targeting *P. yoelii*  
162 P140 protein) for each experiment were: exp. 1 = 29.73; exp.2= 7.18; exp. 3= 57.86; exp. 4= 36.41; exp.  
163 5= 51.71, exp. 6= 4.55; exp. 7= 62.35; exp. 8= 20.50, exp.9= 8.71, exp 10= 18.05, exp. 11= 5.86.  
164 Negative oocyst reduction values were set to zero. Human isotype IgG1 and US human serum pool were  
165 used as additional negative controls ([Extended Data Fig. 5b](#)). Values are shown as mean ± s.e.m. **g,**  
166 LMIV230-01 and LMIV230-02 bind to non-reduced (NR) protein extract of *P. falciparum* NF54 gametes  
167 purified on Nycodenz after 2 hours in exflagellation medium. **h,** LMIV230-01 strongly binds to gametes at  
168 7.5µg/mL while LMIV230-02 does not bind at 7.5µg/mL. or 30µg/mL. Both mAbs were labelled with Alexa  
169 Fluor 488. Scale bars: 5µM.

170

171 LMIV230-01 bound strongly to fixed parasites in numerous developmental stages  
172 including gametocytes, exflagellation centers, microgametes, macrogametes and round  
173 forms (zygotes) collected 4 hours after mosquito feeding. As expected, the mAb did not  
174 bind to the post-fertilization stage ookinetes, obtained 24 hours after the mosquito  
175 bloodmeal ([Fig. 2a](#)).

176 Pfs230 antibody activity depends on complement fixation to lyse *P. falciparum*<sup>17</sup>.

177 To test whether the activity of LMIV230-01 was dependent on activation of the  
178 complement system, we incubated parasites with LMIV230-01 in the presence of intact  
179 or heat-inactivated sera from US donors then assessed lysis of gametes ([Fig. 2b](#)) as  
180 well as transmission of parasites fed to mosquitoes after treatment using the same



181 conditions (**Fig. 2c**). Functional activity of LMIV230-01 to lyse gametes and block oocyst  
182 formation in mosquitoes was substantially reduced in the heat-inactivated sera (**Figs.**  
183 **2b and 2c**), demonstrating complement-dependency. Activation of complement leads to  
184 the formation of the membrane attack complex (MAC), an assembly of the complement  
185 molecules C5b, C6, C7, C8, and C9<sup>18,19</sup> on the parasite surface. Using an antibody that  
186 recognizes assembled MAC, we demonstrated complement fixation on the surface of  
187 live *P. falciparum* gametes that were incubated with LMIV230-01 in the presence of  
188 intact but not heat-inactivated serum (**Fig. 2d and Extended Data Fig. 7**).

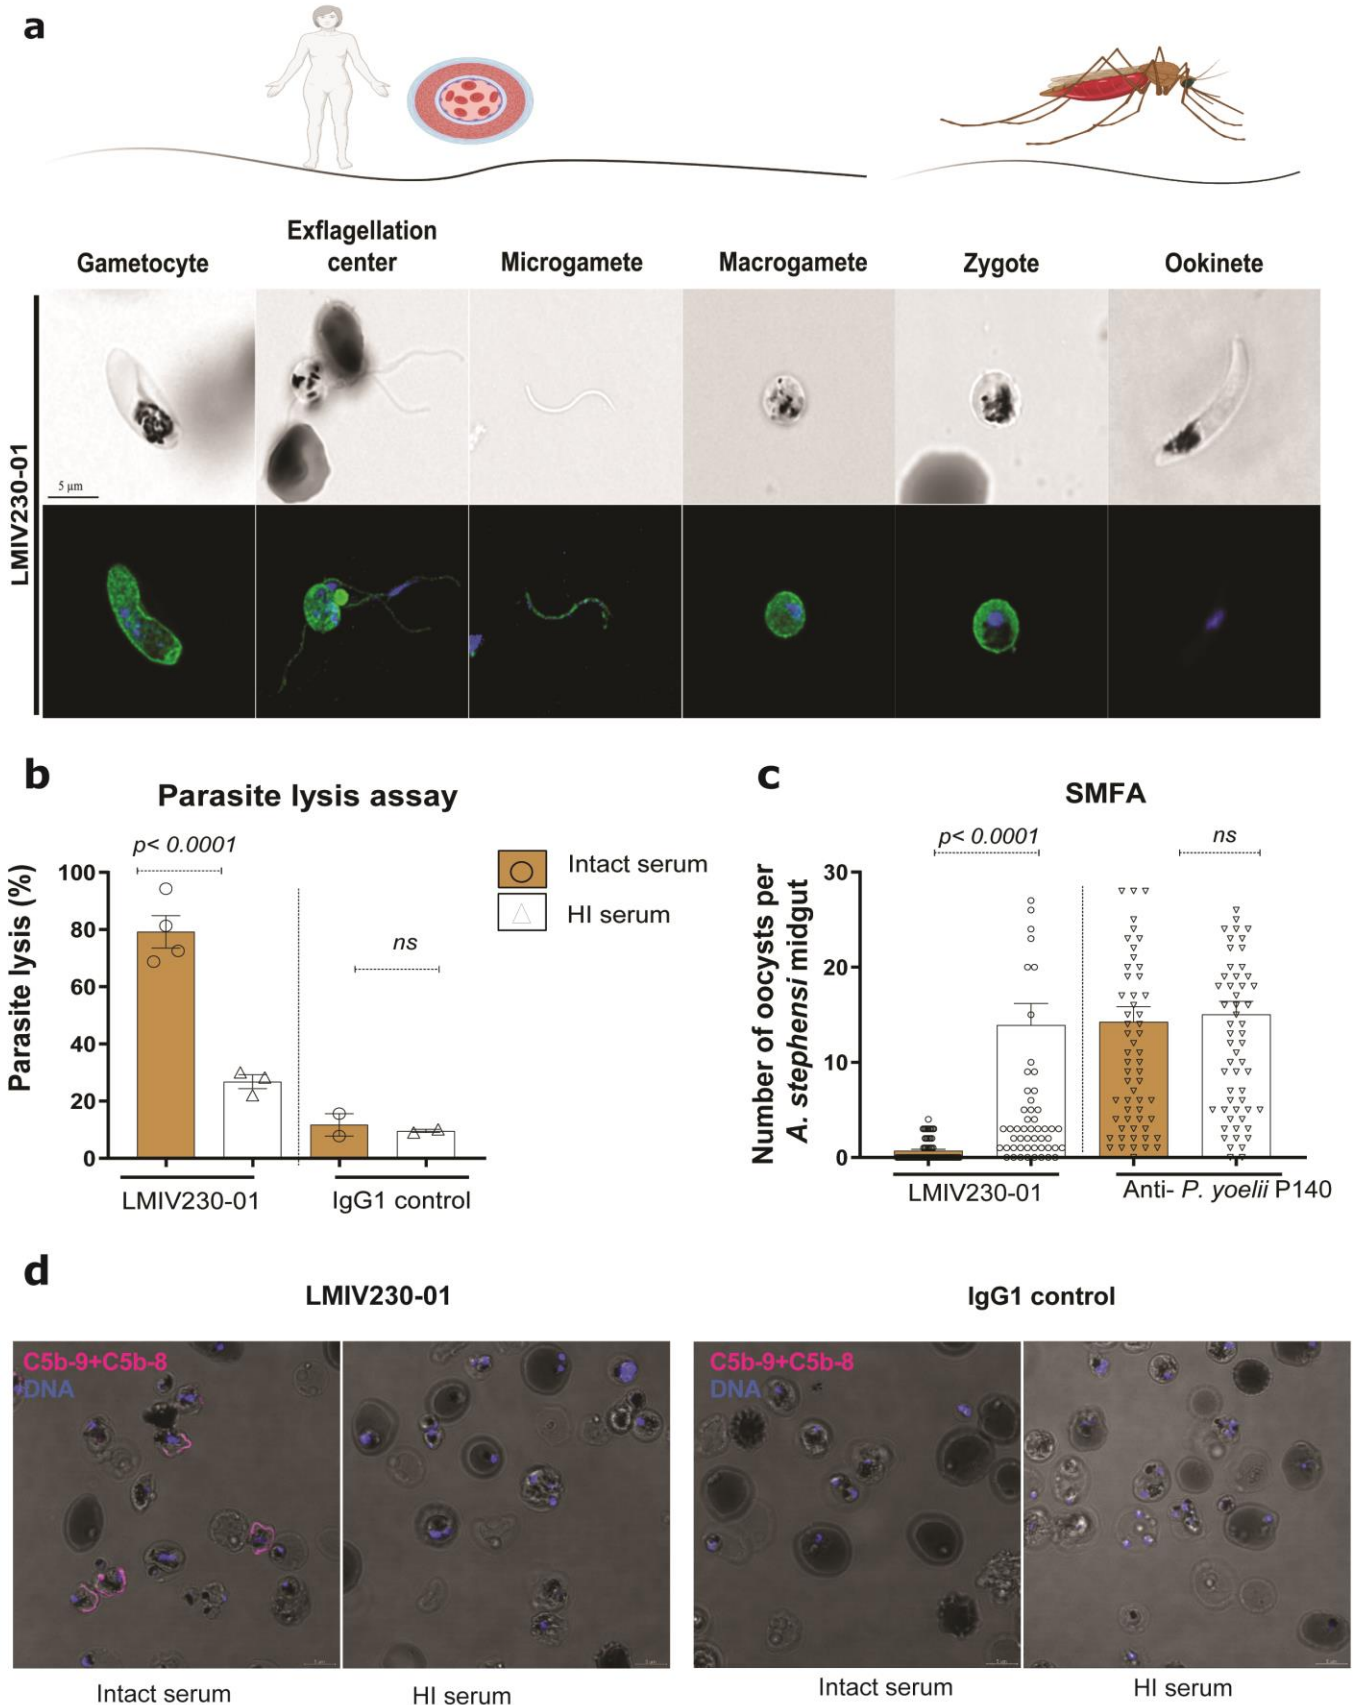

190 **Fig. 2| LMIV230-01 binds to multiple parasite stages and its activity is complement-dependent. a,**  
191 LMIV230-01 strongly binds to permeabilized gametocytes, gametes and zygotes and does not bind to  
192 ookinetes. Parasites were fixed and permeabilized, and 7.5  $\mu\text{g}/\text{mL}$  of antibody was used to stain the  
193 different parasite stages. Scale bars: 5 $\mu\text{M}$ . **b,** *In vitro* parasite lysis by LMIV230-01 is complement-  
194 dependent. Samples were tested in two independent assays, using two different parasite cultures **c,**  
195 Functional activity of LMIV230-01 is also complement-dependent *in vivo* (SMFA with mosquitoes). Data  
196 from three independent SMFA assays.  $N \geq 20$  mosquitos per assay. Oocyst averages in the control  
197 mosquitoes (fed with IgG1 targeting *P. yoelli* P140) for each of the experiments were: exp. 1= 4.55; exp.  
198 2= 20.50, exp. 3=5.86. Data obtained from mosquitoes fed with LMIV230-01 at 1000  $\mu\text{g}/\text{mL}$  with intact  
199 sera were also used to generate figure 1f. Values are shown as mean  $\pm$  s.e.m. One-Way ANOVA and  
200 Turkey's multiple comparisons test were used to compare the different groups **d,** Live imaging of *P.*  
201 *falciparum* NF54 female gametes incubated with LMIV230-01 in the presence of intact serum from a  
202 healthy donor revealed surface-deposited MAC (membrane attack complex) using anti-C5b-9+C5b-8  
203 antibody (magenta color). MAC deposition was not detected in the presence of heat-inactivated (HI)  
204 serum. Scale bars: 5 $\mu\text{M}$ .

205

206 To assess whether LMIV230-01 would also bind to other *P. falciparum* strains,  
207 we prepared gametocytes from a culture-adapted Malian isolate <sup>20</sup> and from St. Lucia  
208 strain (originally from El Salvador) <sup>21</sup>. LMIV230-01 labelled *in vitro*-induced gametes  
209 from both strains (**Fig. 3a and b**). Induction of gamete stage from the newly  
210 characterized Malian isolate was confirmed using a murine anti-Pfs48/45 mAb (**Fig. 3c**).  
211 LMIV230-01 fixed complement on the gamete surface of both strains, confirming that  
212 the antibody is functional against heterologous parasites (**Figs. 3d and e**).

213 To assess the abundance of antibodies that share paratope specificity with  
214 LMIV230-01, we developed an ELISA assay to demonstrate the competition between  
215 post-vaccination sera (tested at a 1:2500 dilution) and LMIV230-01 for binding the  
216 vaccine antigen (**Figure 3f**). Among subjects who received the vaccine, levels of  
217 competing antibody ranged from ~10-70% displacement of Pfs230D1 binding to  
218 LMIV230-01, with a normal distribution confirmed by Shapiro-Wilk test ( $p= 0.52$ ) (**Figure**  
219 **3g**). Levels of competition strongly correlated with total Pfs230D1 IgG titers in sera  
220 (Spearman's  $\rho= 0.604$ ,  $p<0.0001$ ) (**Figure 3h**). Increasing levels of competing

221 antibody also corresponded to serum functional activity measured by SMFA. Because  
222 serum TRA levels of vaccines were high with minimal variability ranging from 95-100%  
223 **(Extended Data Figure 14)**, our primary correlation analysis used TBA (Transmission  
224 Blocking Activity) which indicates the % reduction in the proportion of infected  
225 mosquitoes, a high bar for TBV activity generally seen only when TRA is very high.  
226 Correlation analyses showed that % serum competition was related to TBA  
227 (Spearman's  $\rho = 0.324$ ,  $p = 0.05$ ) **(Figure 3i)**, suggesting that antibodies that compete  
228 for the LMIV230-01 epitope play an important role in serum functional activity. This  
229 result, however, does not exclude the possible role of antibodies that do not compete  
230 with LMIV230-01 in mediating vaccine activity, and notably some sera with high TBA  
231 demonstrated low levels of LMIV230-01 competing antibodies.

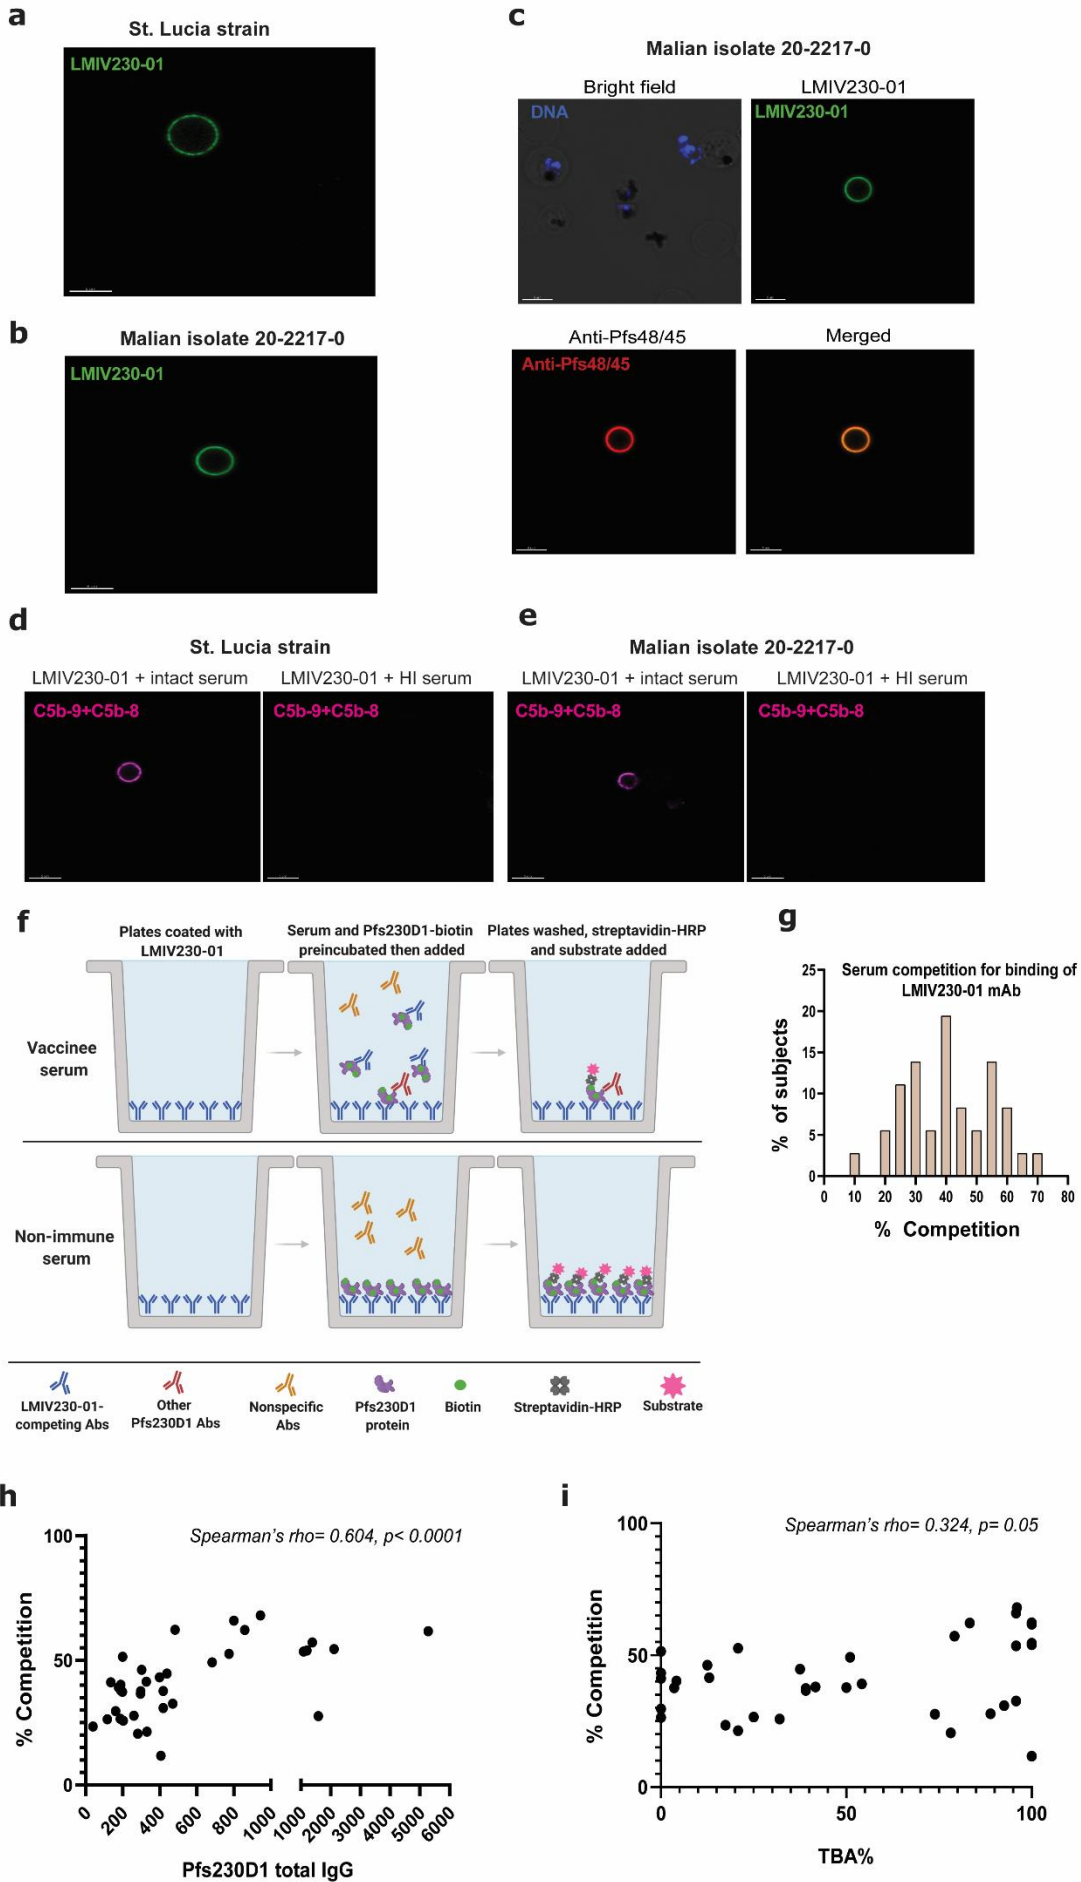

233 **Figure 3| LMIV230-01 binds to heterologous *P. falciparum* strains and antisera from Pfs230D1**  
234 **vaccinees vary widely in levels of antibody that compete with LMIV230-01 for binding. a,** LMIV230-  
235 01 bound to gametes of *St. Lucia* parasite strain and **b,** of an isolate obtained from a Malian adult and  
236 adapted to culture. **c,** Murine anti-48/45 mAb confirms formation of gametes by Malian isolate and its  
237 signal colocalizes with LMIV230-01. “Merged” refers to combination of green and red channels. **d,**  
238 Membrane attack complex forms on gametes of *St. Lucia* strain and **e,** of a Malian isolate incubated with  
239 LMIV230-01 in the presence of intact but not heat-inactivated serum. Scale bars for all images in this  
240 panel: 5µM. **f,** Cartoon schematizing LMIV230-01 competition ELISA assay. **g,** Distribution of serum  
241 antibody levels that compete with LMIV230-01 for binding to Pfs230D1 in 36 subjects who received  
242 Pfs230D1-EPA vaccine. Values displayed represent mean from three independent experiments. **h,**  
243 Relationship of LMIV230-01-competing antibody levels to total Pfs230D1 antibody titers, or **i,** to serum  
244 functional activity (TBA, transmission blocking activity) measured by SMFA.

245

246 Altogether, our data confirm that vaccination with TBV can elicit strong  
247 neutralizing antibodies, capable of binding to gametocytes, gametes, and zygotes, and  
248 of impairing fertilization in the mosquito. Due to its complex domains and repeating  
249 motifs with numerous disulfide bonds, expression of full length Pfs230 has been  
250 difficult<sup>22,23</sup>. Preclinical studies of Pfs230 fragments have shown that immunization with  
251 recombinant domain 1 of Pfs230 (Pfs230D1), but not other domains, induces strong  
252 functional TRA in SMFA<sup>3,22,24</sup>.

253 Our data support further development of TBV strategies to induce potent  
254 antibody responses against mosquito sexual stage parasites.

255

256 **ACKNOWLEDGMENTS**

257 This work was funded by the Intramural Research Program of the National Institute of  
258 Allergy and Infectious Diseases, National Institutes of Health. Calvin Eigsti provided  
259 support for single cell sorting; Sundar Ganesan for live cell imaging; Ashley McCormack  
260 and Emily Higbee for Standard Membrane Feeding Assays; and J. Patrick Gorres for  
261 proofreading and editing this manuscript. We are thankful to Jillian Neal and Robert  
262 Morrison for determining the Pfs230D1 sequence for the Malian *P. falciparum* isolate.  
263 JT and JDG were supported by the Swiss National Science Foundation (Ambizione-  
264 SCORE fellowship to JT: PZ00P3\_161147; PZ00P3\_183777). We thank the staff  
265 members of GM/CA beamline at the Advanced Photon Source, Argonne National  
266 Laboratory for beamline support.

267

268

269 **AUTHOR CONTRIBUTIONS**

270

271 C.H.C. and P.E.D. conceived the single B cell sorting of Pfs230D1-specific B cells, V  
272 gene repertoire analyses, antibody generation, conventional and competitive ELISAs,  
273 Western blot, microscopy-based binding assays and in vitro and in vivo functional  
274 characterization of mAbs. W.K.T. and N.H.T. conceived the epitope binning and  
275 biophysical studies. C.H.C, W.K.T., N.H.T and P.E.D conceived the analysis of  
276 polymorphisms. C.H.C., W.K.T., M.B., J.R., A.S., T.A.S., W.P., X.H., B.B., O.M., B. J,  
277 M.S. and N.D.S. performed the experiments. M.E., C.H.C., and J.D.G. performed  
278 bioinformatic analyses. N.J.M., K.R., V.N., R.H., R.S. and D.N. generated recombinant  
279 Pfs230D1. I.S., J.J.T., J.V.R., J.T., J.H., M.B.S, J.R., N.H.T. and P.E.D. supervised the

280 experiments and interpreted the data. C.H.C., W.K.T., N.H.T. and P.E.D. wrote the  
281 manuscript, with input from all authors.

282

### 283 **COMPETING INTERESTS**

284 M.B.S, W.P., X.H., B.B., and M.E. declare competing financial interests as all are  
285 employees of iRepertoire Inc., and J.H. is co-founder and CEO. J.D.G. is an employee  
286 of Alchemab Therapeutics Limited.

### 287 **CODE AVAILABILITY**

288 Code is available on request from the corresponding author.

289

290

291

292

293

294

295

296

297

298

299

300

301

302

303



304 **EXTENDED DATA - FIGURES**

305

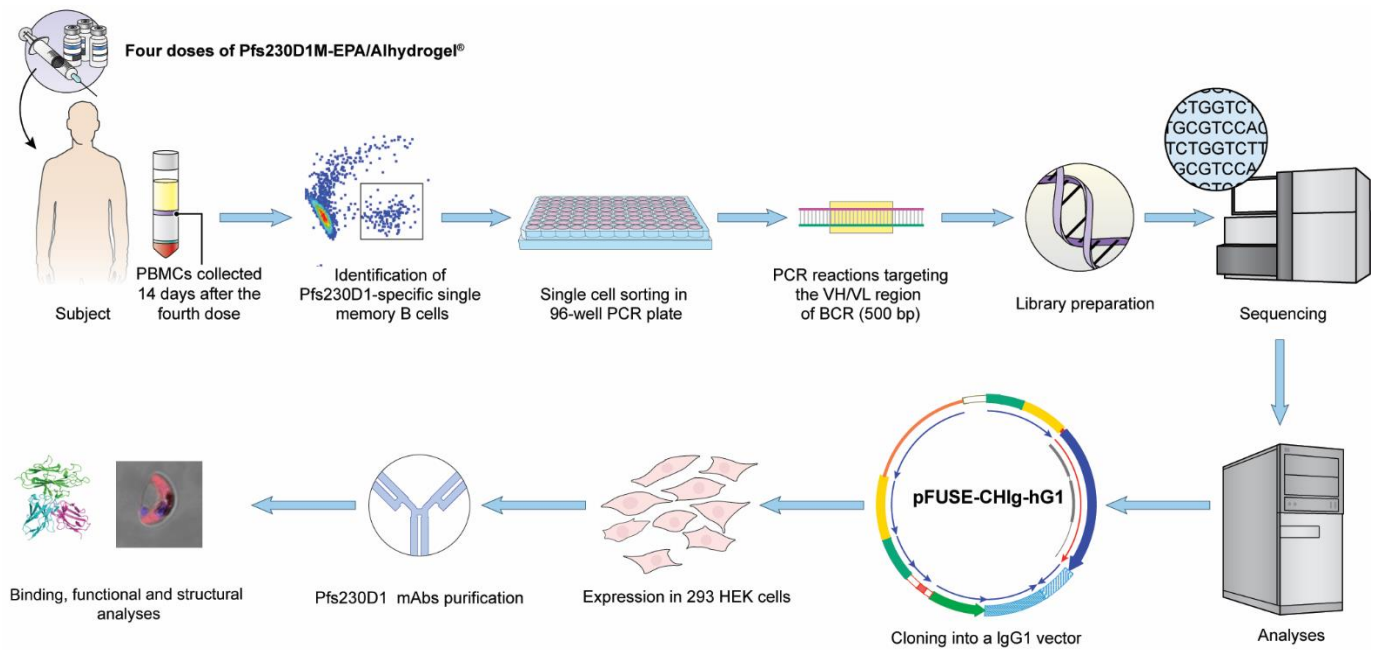

306

307 **Extended Data Fig. 1|** Experimental pipeline. Pfs230D1-specific single B cells were sorted from PBMCs  
308 of eight Malian adults who had been immunized with four doses of 40µg of Pfs230D1-EPA/Alhydrogel®.  
309 After extraction of single B cells, a 500 bp fragment of the BCR variable regions of VH/VL were amplified  
310 and sequenced. Matched VH/VL pairs that were identified in more than one B cell were preferentially  
311 selected for cloning in an IgG1 vector for expression in 293 HEK cells and subsequent analyses.

312

313

314

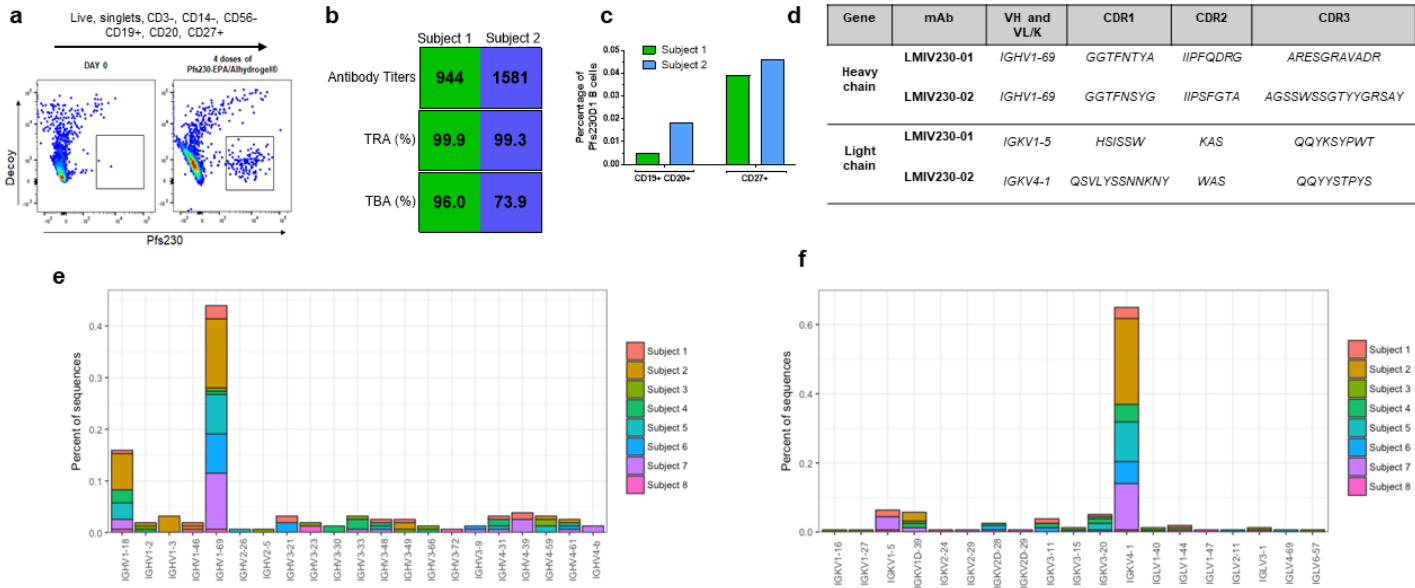

315

316

317 **Extended Data Fig. 2| Pfs230D1-specific mAbs belong to the same heavy chain germline subgroup**  
 318 **but differ for kappa chain.** **a**, Sorted memory B cells were gated as live, single cells, excluded for CD3,  
 319 CD14 and CD56, and gated on CD19<sup>+</sup>, CD20<sup>+</sup>, CD27<sup>+</sup> cells. Then, a tetramer approach was used to  
 320 select antigen-specific cells and reduce nonspecific binding. Cells binding to the decoy tetramer (BSA)  
 321 were excluded and only those binding to Pfs230D1 were selected for sorting. **b**, Serum from each subject  
 322 was used to measure antibody titers against Pfs230D1 and functional activity to reduce oocyst burden in  
 323 Standard Membrane Feeding Assays (SMFA). TRA= Transmission Reducing Activity measured as the  
 324 reduction in average oocyst count; TBA= Transmission Blocking Activity measured as the reduction in the  
 325 proportion of infected mosquitoes. **c**, Proportion of memory B cells for each subject that are Pfs230D1-  
 326 specific. **d**, Complementarity-determining regions (CDRs) of each sequence selected for mAb  
 327 expression. **e**, IGKV4-1 germline (gene sequence in LMIV230-02) was the most frequent for the kappa  
 328 chain genes. IGKV1-5 germline (gene sequence in LMIV230-01) was found in only three subjects **f**,  
 329 Sequences related to germline 1-69 of the IGHV gene were the most frequently elicited in response to the  
 330 vaccination.

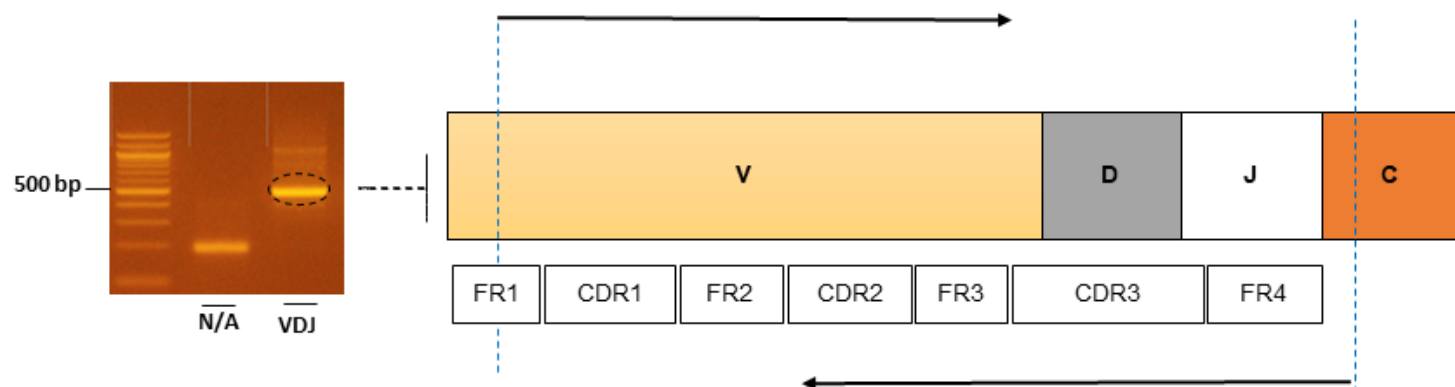

331 **Extended Data Fig. 3| Amplification of V(D)J region.** 500 bp fragment amplified from cDNA of sorted  
332 Pfs230D1-specific single B cell. This fragment was obtained using primers targeting the V(D)J region  
333 (iRepertoire Inc.).

334

335

336

337

338

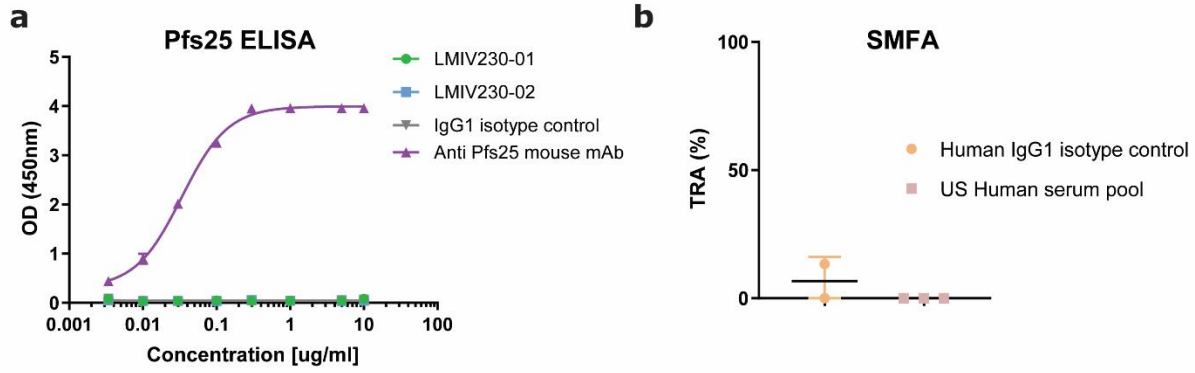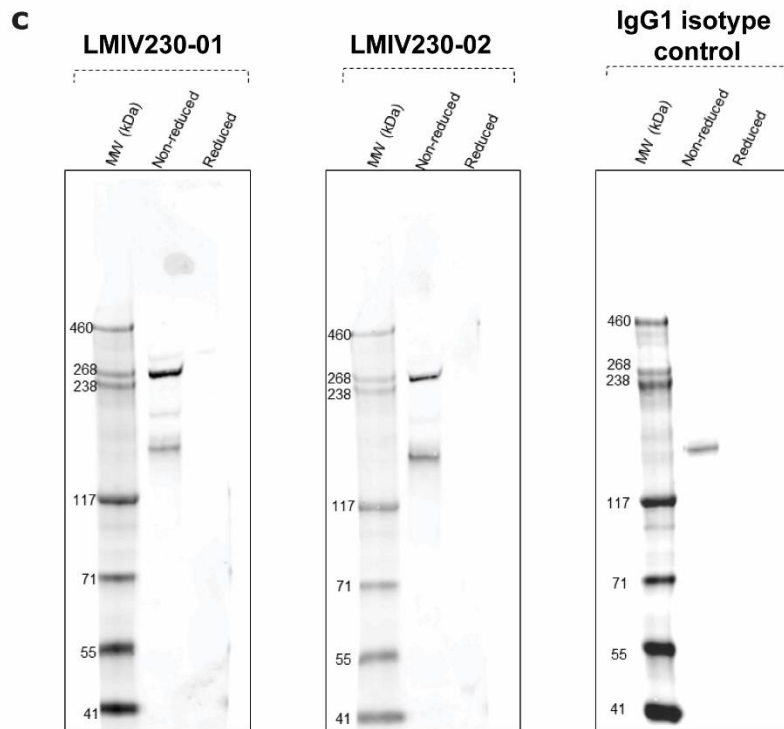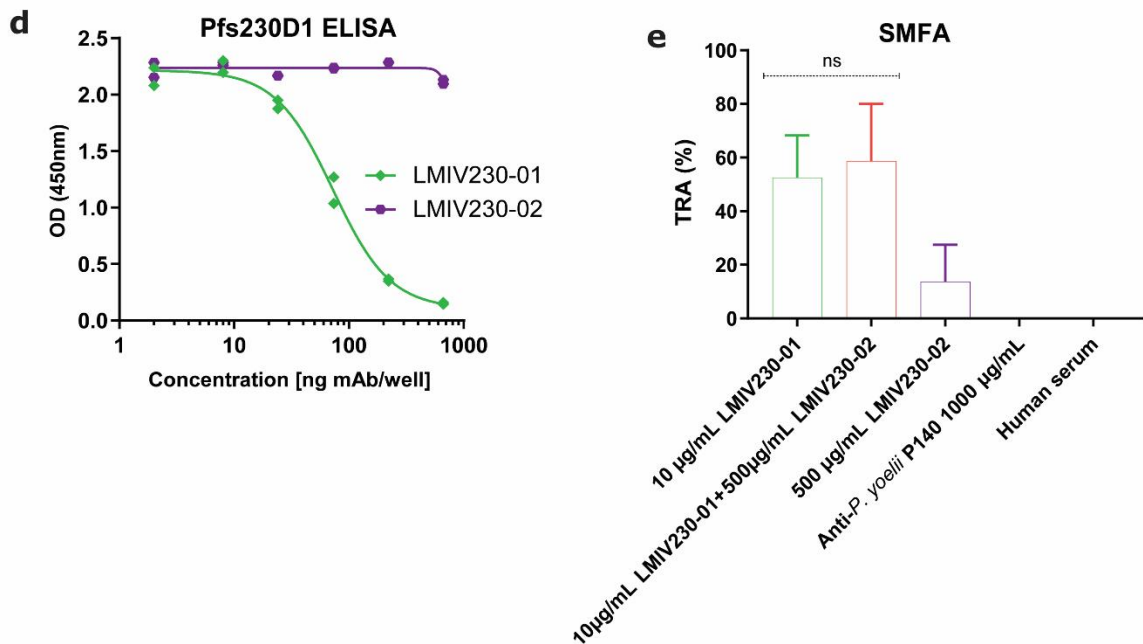

340 **Extended Data Fig.5| Additional binding and functional characterization of LMIV230-01 and -02. a,**  
341 Both mAbs failed to bind to the ookinete protein Pfs25. **b,** Additional controls for the Standard Membrane  
342 Feeding Assay (SMFA). Human IgG1 isotype control was expressed using the same conditions as  
343 LMIV230-01 and -02 and was used in this assay at 1000µg/mL. Sixty microliters of undiluted human  
344 pooled serum obtained from US healthy donors were used as additional control. Values are shown as  
345 mean ± s.e.m. **c,** Full depiction of the Western blot gel displayed in [Fig. 1g](#). **d,** The two mAbs do not  
346 compete for the same epitope in the recombinant Pfs230D1 protein, since unlabelled LMIV230-01 blocks  
347 binding of LMIV-230-01-HRP to immobilized Pfs230D1 but LMIV230-02 does not. **e,** Combination of  
348 LMIV230-01 and LMIV230-02 did not increase functional activity over LMIV230-01 alone. Control  
349 mosquitoes were fed with mouse IgG1 mAb targeting *P. yoelii* P140 protein, or with non-immune human  
350 serum.

351

352

353

354

355

356 [\[EXT. DATA FIGURE 6 WILL BE AVAILABLE IN THE PUBLISHED VERSION\]](#)

357

358

359

360

361

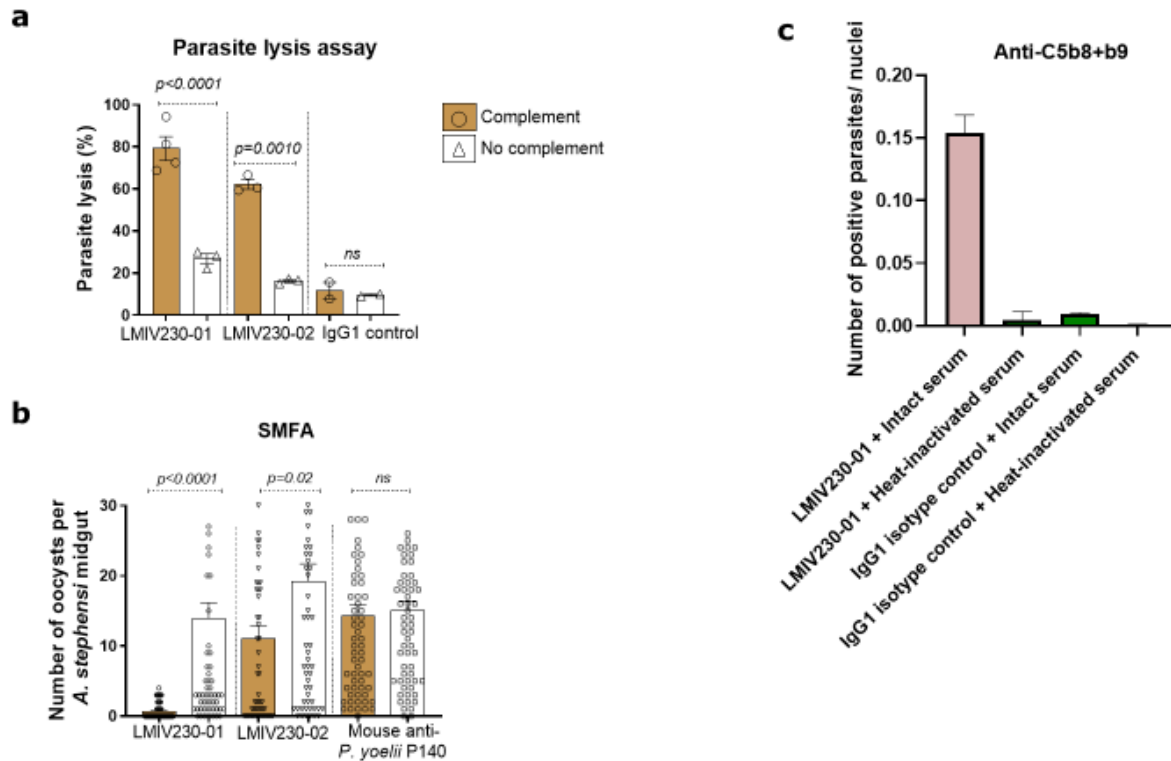

362

363 **Extended Data Fig.7| Pfs230 mAbs activity is complement-dependent and LMIV230-01 competing**  
 364 **antibodies are acquired at varying levels by vaccinees. a,** Activity of LMIV230-01 and LMIV230-02 is  
 365 complement-dependent in the vitro lysis assay and **b,** in the vivo mosquito feeding assay. **c,** Membrane  
 366 attack complexes (MAC) on parasites were detected using an Alexa 488-labeled antibody that recognizes  
 367 the assembled MAC complex (anti C5b-9+ C5b-8). Gametes incubated with LMIV230-01 and intact  
 368 serum produced MAC-positive parasites. Heat-inactivating serum to degrade the heat-labile components  
 369 of the complement pathway eliminated deposition of MAC on gametes. MAC-positive *P. falciparum* strain  
 370 NF54 gametes were enumerated in a large, tiled confocal image and normalized to the number of  
 371 Hoechst-stained nuclei.

372

373

374

375

376

377

378

379

380

381 *[EXT. DATA FIGURES 8- 13 WILL BE AVAILABLE IN THE PUBLISHED VERSION]*

382

383

384

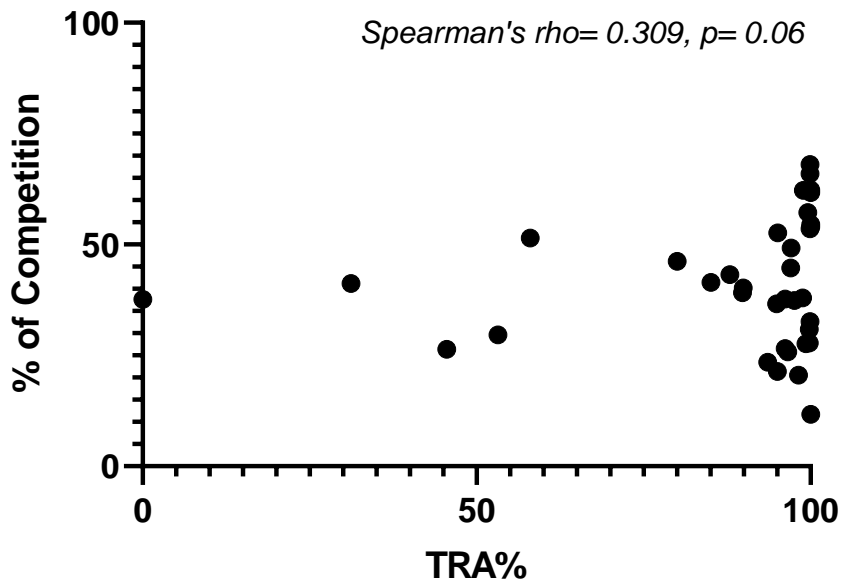

385

386 **Extended Data Fig. 14| Correlation between levels of LMIV230-01 competing antibodies and**  
387 **Transmission-Reducing Activity (TRA) measured in SMFA.**

388

389

390

391

392

393

394

395

396

397

398

399 **EXTENDED DATA – TABLES**

400

| <b>Subject ID</b> | <b>Antibody titers</b> | <b>TRA (%)</b> | <b>TBA (%)</b> |
|-------------------|------------------------|----------------|----------------|
| 1                 | 944                    | 99.9           | 96             |
| 2                 | 1581                   | 99.3           | 73.9           |
| 3                 | 2115                   | 100            | 100            |
| 4                 | 1382                   | 99.6           | 79.2           |
| 5                 | 2100                   | 100            | 100            |
| 6                 | 5277                   | 100            | 100            |
| 7                 | 800                    | 99.9           | 95.8           |
| 8                 | 774                    | 95.1           | 20.8           |

401

402 **Extended Data Table 1-** Antibody titers and functional activity of sera from the eight subjects whose  
 403 sequences were analyzed in this study. TRA= Transmission-reducing activity. TBA=Transmission  
 404 blocking activity.

405

406

|                               | <b>K<sub>D</sub></b><br>(x 10 <sup>-10</sup> ± SEM M) | <b>k<sub>a</sub></b><br>(x 10 <sup>5</sup> ± SEM 1/Ms) | <b>k<sub>dis</sub></b><br>(x 10 <sup>-4</sup> ± SEM 1/s) | <b>N</b> |
|-------------------------------|-------------------------------------------------------|--------------------------------------------------------|----------------------------------------------------------|----------|
| <b>LMIV230-01</b>             |                                                       |                                                        |                                                          |          |
| <b>Biological Replicate 1</b> | 1.58 ± 0.77                                           | 1.71 ± 0.06                                            | 0.28 ± 0.15                                              | 3        |
| <b>Biological Replicate 2</b> | 2.06 ± 0.99                                           | 1.80 ± 0.04                                            | 0.37 ± 0.18                                              | 3        |
| <b>LMIV230-02</b>             |                                                       |                                                        |                                                          |          |
| <b>Biological Replicate 1</b> | 6.36 ± 0.24                                           | 7.67 ± 0.21                                            | 4.87 ± 0.06                                              | 3        |
| <b>Biological Replicate 2</b> | 4.27 ± 0.22                                           | 6.37 ± 0.13                                            | 2.71 ± 0.10                                              | 3        |

407

408 **Extended Data Table 2-** Binding of mAbs LMIV230-01 and LMIV230-02 to Pfs230D1 using Biolayer  
 409 Interferometry. Binding data for each mAb was fitted using a 1:1 binding model. The averages for two  
 410 biological replicates, composed of three technical replicates each, are shown for both mAbs.

411

412

413 *[EXT. DATA TABLES 3-7 WILL BE AVAILABLE IN THE PUBLISHED VERSION]*

414

415



416 **REFERENCES**

417

- 418 1. Eksi, S., *et al.* Malaria transmission-blocking antigen, Pfs230, mediates human red blood cell binding to  
419 exflagellating male parasites and oocyst production. *Mol Microbiol* **61**, 991-998 (2006).
- 420 2. Williamson, K.C., Keister, D.B., Muratova, O. & Kaslow, D.C. Recombinant Pfs230, a Plasmodium  
421 falciparum gametocyte protein, induces antisera that reduce the infectivity of Plasmodium falciparum to  
422 mosquitoes. *Mol Biochem Parasitol* **75**, 33-42 (1995).
- 423 3. Tachibana, M., *et al.* Identification of domains within Pfs230 that elicit transmission blocking antibody  
424 responses. *Vaccine* **37**, 1799-1806 (2019).
- 425 4. Triller, G., *et al.* Natural Parasite Exposure Induces Protective Human Anti-Malarial Antibodies. *Immunity* **47**,  
426 1197-1209 e1110 (2017).
- 427 5. Kisalu, N.K., *et al.* A human monoclonal antibody prevents malaria infection by targeting a new site of  
428 vulnerability on the parasite. *Nat Med* **24**, 408-416 (2018).
- 429 6. Alanine, D.G.W., *et al.* Human Antibodies that Slow Erythrocyte Invasion Potentiate Malaria-Neutralizing  
430 Antibodies. *Cell* **178**, 216-228 e221 (2019).
- 431 7. Rappuoli, R., Bottomley, M.J., D'Oro, U., Finco, O. & De Gregorio, E. Reverse vaccinology 2.0: Human  
432 immunology instructs vaccine antigen design. *J Exp Med* **213**, 469-481 (2016).
- 433 8. Tan, J., *et al.* A LAIR1 insertion generates broadly reactive antibodies against malaria variant antigens.  
434 *Nature* **529**, 105-109 (2016).
- 435 9. Watson, C.T., *et al.* Complete haplotype sequence of the human immunoglobulin heavy-chain variable,  
436 diversity, and joining genes and characterization of allelic and copy-number variation. *Am J Hum Genet* **92**,  
437 530-546 (2013).
- 438 10. Avnir, Y., *et al.* Molecular signatures of hemagglutinin stem-directed heterosubtypic human neutralizing  
439 antibodies against influenza A viruses. *PLoS Pathog* **10**, e1004103 (2014).
- 440 11. Avnir, Y., *et al.* IGHV1-69 polymorphism modulates anti-influenza antibody repertoires, correlates with IGHV  
441 utilization shifts and varies by ethnicity. *Sci Rep* **6**, 20842 (2016).
- 442 12. Lensen, A., *et al.* Measurement by membrane feeding of reduction in Plasmodium falciparum transmission  
443 induced by endemic sera. *Trans R Soc Trop Med Hyg* **90**, 20-22 (1996).
- 444 13. Miura, K., *et al.* Transmission-blocking activity is determined by transmission-reducing activity and number  
445 of control oocysts in Plasmodium falciparum standard membrane-feeding assay. *Vaccine* **34**, 4145-4151  
446 (2016).
- 447 14. Doolan, K.M. & Colby, D.W. Conformation-dependent epitopes recognized by prion protein antibodies  
448 probed using mutational scanning and deep sequencing. *J Mol Biol* **427**, 328-340 (2015).
- 449 15. Verrier, F.C., *et al.* Antibodies to several conformation-dependent epitopes of gp120/gp41 inhibit CCR-5-  
450 dependent cell-to-cell fusion mediated by the native envelope glycoprotein of a primary macrophage-tropic  
451 HIV-1 isolate. *Proc Natl Acad Sci U S A* **94**, 9326-9331 (1997).
- 452 16. Outchkourov, N., *et al.* Epitope analysis of the malaria surface antigen pfs48/45 identifies a subdomain that  
453 elicits transmission blocking antibodies. *J Biol Chem* **282**, 17148-17156 (2007).
- 454 17. Healer, J., *et al.* Complement-mediated lysis of Plasmodium falciparum gametes by malaria-immune human  
455 sera is associated with antibodies to the gamete surface antigen Pfs230. *Infect Immun* **65**, 3017-3023  
456 (1997).
- 457 18. Tegla, C.A., *et al.* Membrane attack by complement: the assembly and biology of terminal complement  
458 complexes. *Immunol Res* **51**, 45-60 (2011).
- 459 19. Bayly-Jones, C., Bubeck, D. & Dunstone, M.A. The mystery behind membrane insertion: a review of the  
460 complement membrane attack complex. *Philos Trans R Soc Lond B Biol Sci* **372**(2017).
- 461 20. Doritchamou, J.Y.A., *et al.* Placental malaria vaccine candidate antigen VAR2CSA displays atypical domain  
462 architecture in some Plasmodium falciparum strains. *Commun Biol* **2**, 457 (2019).
- 463 21. Collins, W.E., Warren, M., Skinner, J.C., Richardson, B.B. & Kears, T.S. Infectivity of the Santa Lucia (El  
464 Salvador) strain of Plasmodium falciparum to different anophelines. *J Parasitol* **63**, 57-61 (1977).
- 465 22. MacDonald, N.J., *et al.* Structural and Immunological Characterization of Recombinant 6-Cysteine Domains  
466 of the Plasmodium falciparum Sexual Stage Protein Pfs230. *J Biol Chem* **291**, 19913-19922 (2016).
- 467 23. Farrance, C.E., *et al.* A plant-produced Pfs230 vaccine candidate blocks transmission of Plasmodium  
468 falciparum. *Clin Vaccine Immunol* **18**, 1351-1357 (2011).
- 469 24. Singh, S.K., *et al.* Pfs230 and Pfs48/45 Fusion Proteins Elicit Strong Transmission-Blocking Antibody  
470 Responses Against Plasmodium falciparum. *Front Immunol* **10**, 1256 (2019).

- 471 25. Tonkin, M.L., *et al.* Structural and biochemical characterization of Plasmodium falciparum 12 (Pf12) reveals  
472 a unique interdomain organization and the potential for an antiparallel arrangement with Pf41. *J Biol Chem*  
473 **288**, 12805-12817 (2013).
- 474 26. Parker, M.L., Peng, F. & Boulanger, M.J. The Structure of Plasmodium falciparum Blood-Stage 6-Cys  
475 Protein Pf41 Reveals an Unexpected Intra-Domain Insertion Required for Pf12 Coordination. *PLoS One* **10**,  
476 e0139407 (2015).
- 477 27. Kundu, P., *et al.* Structural delineation of potent transmission-blocking epitope I on malaria antigen Pfs48/45.  
478 *Nat Commun* **9**, 4458 (2018).
- 479 28. Holm, L. & Rosenstrom, P. Dali server: conservation mapping in 3D. *Nucleic Acids Res* **38**, W545-549  
480 (2010).

481
